# Supplementary material for: Hemolytic disease of the fetus and newborn: rapid review of postnatal care and outcomes
Source: Springer Nature journal article supplement (doi:10.1186/s12884-023-06061-y), 2023-10-18
Supplement: MOESM1 [file 26196104]

## Appendix S1. Search Strategy

| #  | Description                    | Search string                                                                                                                                                                                                                                                                                                                                                                                                                                                                                                                                                                                                                                                      | Hits                   |
|----|--------------------------------|--------------------------------------------------------------------------------------------------------------------------------------------------------------------------------------------------------------------------------------------------------------------------------------------------------------------------------------------------------------------------------------------------------------------------------------------------------------------------------------------------------------------------------------------------------------------------------------------------------------------------------------------------------------------|------------------------|
| S1 | Disease state                  | (EMB.EXACT.EXPLODE("newborn hemolytic disease") OR MESH.EXACT.EXPLODE("Erythroblastosis, Fetal")) AND (TI,AB(HDFN OR ((hemolytic OR haemolytic) NEAR/3 (fetus OR newborn OR foetus)))) OR TI,AB("hemolytic disease of the fetus and newborn" OR "haemolytic disease of the fetus and newborn" OR "hemolytic disease of the foetus and newborn" OR "haemolytic disease of the foetus and newborn" OR "hemolytic disease of the newborn" OR "haemolytic disease of the newborn" OR HDFN) OR EMB.EXACT.EXPLODE("alloimmunization") OR ("maternal alloimmunization") OR ("red cell alloimmunization"))                                                                 | 12,499 <sup>a</sup>    |
| S2 | Intervention/treatment setting | EMB.EXACT("intrauterine blood transfusion") OR EMB.EXACT("fetal therapy") OR EMB.EXACT.EXPLODE("neonatal intensive care unit") OR MESH.EXACT.EXPLODE("Fetal Therapies") OR MESH.EXACT("Intensive Care Units, Neonatal") OR EMB.EXACT("immunoglobulin") OR MESH.EXACT("Immunoglobulins, Intravenous") OR EMB.EXACT.EXPLODE("plasma exchange") OR MESH.EXACT.EXPLODE("Plasma Exchange") OR ("therapeutic plasma exchange") OR ("neonatal transfusion") OR EMB.EXACT.EXPLODE("exchange blood transfusion") OR ("neonatal exchange transfusion"))                                                                                                                      | 23,3001 <sup>a</sup>   |
| S3 | Clinical outcomes              | MESH.EXACT("Mortality") OR EMB.EXACT("mortality") OR EMB.EXACT("infant mortality") OR MESH.EXACT.EXPLODE("Infant Mortality") OR MESH.EXACT(Morbidity) OR EMB.EXACT(morbidity) OR MESH.EXACT.EXPLODE("Anemia, Neonatal") OR MESH.EXACT.EXPLODE("Hyperbilirubinemia") OR MESH.EXACT("Fetal Blood") OR MESH.EXACT("Perinatal Death") OR MESH.EXACT("Fetal Death") OR EMB.EXACT("newborn jaundice") OR EMB.EXACT("neonatal hyperbilirubinemia") OR EMB.EXACT("anemia") OR EMB.EXACT("hyperbilirubinemia") OR EMB.EXACT.EXPLODE("perinatal morbidity") OR EMB.EXACT("newborn death") OR EMB.EXACT("fetus death") OR EMB.EXACT("rhesus incompatibility") OR (late NEAR/3 | 6,724,924 <sup>a</sup> |

|    |                                                                  |                                                                                                                                                                                                                                                                                                                                                                                                                                                                                                   |                   |
|----|------------------------------------------------------------------|---------------------------------------------------------------------------------------------------------------------------------------------------------------------------------------------------------------------------------------------------------------------------------------------------------------------------------------------------------------------------------------------------------------------------------------------------------------------------------------------------|-------------------|
|    |                                                                  | anemia) OR TI,AB(complication*) OR TI,AB(adverse /NEAR1 (effect* OR reaction* OR event*)) OR MESH.EXACT("Hydrops Fetalis") OR EMB.EXACT.EXPLODE("edema") OR EMB.EXACT.EXPLODE("fetus hydrops") OR MESH.EXACT.EXPLODE("Premature Birth") OR EMB.EXACT.EXPLODE("prematurity") OR (emergency NEAR/2 childbirth OR delivery OR cesarean section) OR MESH.EXACT.EXPLODE("Respiration, Artificial") OR EMB.EXACT("artificial ventilation") OR MESH.EXACT("Heart Failure") OR EMB.EXACT("heart failure") |                   |
| S4 | Combined disease                                                 | S1 AND S2                                                                                                                                                                                                                                                                                                                                                                                                                                                                                         | 1903 <sup>b</sup> |
| S5 | State and outcomes of interest                                   | S1 AND S3                                                                                                                                                                                                                                                                                                                                                                                                                                                                                         | 3619 <sup>b</sup> |
| S6 | Total hits                                                       | S4 OR S5                                                                                                                                                                                                                                                                                                                                                                                                                                                                                          | 5069 <sup>a</sup> |
| S7 | Final hits published between January 1, 2005, and March 10, 2021 | S6 AND publication date (>2004)                                                                                                                                                                                                                                                                                                                                                                                                                                                                   | 2518 <sup>b</sup> |

<sup>a</sup>Duplicates were removed from the search but included in the result count.

<sup>b</sup>Duplicates were removed from the search and from the result count.

## Appendix S2. Inclusion and Exclusion Criteria<sup>a</sup>

|                      | <b>Inclusion criteria</b>                                                                                                                                                                                                                                                                                                                                                             | <b>Exclusion criteria</b>                                                                                                                                                                                                                                  |
|----------------------|---------------------------------------------------------------------------------------------------------------------------------------------------------------------------------------------------------------------------------------------------------------------------------------------------------------------------------------------------------------------------------------|------------------------------------------------------------------------------------------------------------------------------------------------------------------------------------------------------------------------------------------------------------|
| <u>P</u> opulation   | <ul style="list-style-type: none"> <li>• Infants or children experiencing or having experienced HDFN caused by Rh incompatibility</li> <li>• Antigen status: Rh(D) or Kell antigen</li> </ul>                                                                                                                                                                                         | <ul style="list-style-type: none"> <li>• Infants and children who did not experience HDFN and newborns with ABO incompatibility</li> <li>• Antigen status: c, e, E, Duffy (Fy), Kidd (Jk), MNS (S), or Gerbich antigen</li> </ul>                          |
| <u>I</u> ntervention | <ul style="list-style-type: none"> <li>• Any or none</li> </ul>                                                                                                                                                                                                                                                                                                                       | <ul style="list-style-type: none"> <li>• Not applicable</li> </ul>                                                                                                                                                                                         |
| <u>C</u> omparator   | <ul style="list-style-type: none"> <li>• Any or none</li> </ul>                                                                                                                                                                                                                                                                                                                       | <ul style="list-style-type: none"> <li>• Not applicable</li> </ul>                                                                                                                                                                                         |
| <u>O</u> tcomes      | <ul style="list-style-type: none"> <li>• Treatment patterns</li> <li>• Clinical outcomes</li> <li>• Treatment efficacy</li> </ul>                                                                                                                                                                                                                                                     | <ul style="list-style-type: none"> <li>• Not applicable</li> </ul>                                                                                                                                                                                         |
| <u>S</u> tudy design | <ul style="list-style-type: none"> <li>• Observational studies (retrospective or prospective), including cohort, case-control, or cross-sectional studies</li> <li>• Trials (randomized or nonrandomized)</li> <li>• Modeling studies</li> <li>• Systematic reviews of cohort studies (for identification of primary studies only)</li> <li>• Case reports and case series</li> </ul> | <ul style="list-style-type: none"> <li>• Notes, editorials, or commentaries</li> <li>• Nonsystematic reviews</li> </ul>                                                                                                                                    |
| <u>O</u> ther        | <ul style="list-style-type: none"> <li>• Journal articles</li> <li>• Human subjects</li> <li>• English language</li> <li>• Studies published between January 1, 2005, and March 10, 2021</li> </ul>                                                                                                                                                                                   | <ul style="list-style-type: none"> <li>• Indexed conference abstracts</li> <li>• Publication types not of interest</li> <li>• Animal or preclinical studies</li> <li>• Non-English language</li> <li>• Studies published before January 1, 2005</li> </ul> |

HDFN, hemolytic disease of the fetus and newborn; PICOS, Population, Intervention, Comparison, Outcomes, and Study; Rh, Rhesus.

<sup>a</sup>PICOS design was used as a framework to formulate eligibility criteria.
